# Supplementary material for: Synergistic Impacts of Climate Variabilities on Marine Heatwaves inShelf Seas
Source: Research Square preprint supplement (doi:10.21203/rs.3.rs-6503093/v1), 2025-04-24
Supplement: Supplementary file 1 [file dfd3860623043f3f546d118c.pdf]

## **Supplementary Information**

### **Synergistic Impacts of Climate Variabilities on Marine Heatwaves in Shelf Seas**

Yuxin LIN<sup>1,2</sup>, Zhiqiang LIU<sup>1,3\*</sup>, Feng Zhou<sup>4,5</sup>, Qicheng Meng<sup>4,5</sup>, Wenyan Zhang<sup>2\*</sup>

<sup>1</sup>Department of Ocean Science and Engineering, Southern University of Science and Technology, Shenzhen, China

<sup>2</sup>Institute of Coastal Systems—Analysis and Modeling, Helmholtz-Zentrum Hereon, Geesthacht, Germany.

<sup>3</sup>Center for Complex Flows and Soft Matter Research, Southern University of Science and Technology, Shenzhen, China

<sup>4</sup>State Key Laboratory of Satellite Ocean Environment Dynamics, Second Institute of Oceanography, Ministry of Natural Resources, Hangzhou, China

<sup>5</sup>Observation and Research Station of Yangtze River Delta Marine Ecosystems, Ministry of Natural Resources, Zhoushan, China

## Supplementary Figures

This section includes supplementary figures noted in the main text.

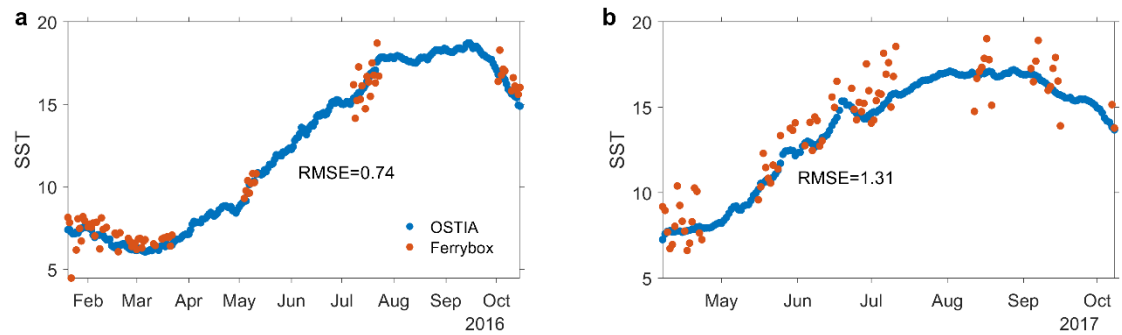

**Supplementary Figure 1.** Comparison of SST from the Operational Sea Surface Temperature and Sea Ice Analysis (OSTIA) dataset (blue line) with FerryBox in-situ measurements (red dots). Our validation focused on two specific routes: **a** “Hafnia20160120” (0.2°W-8.7°E, 52.6-54.9°N) and **b** “Lysbris20170407” (0.2°W-12.8°E, 51.3-59.4°N).

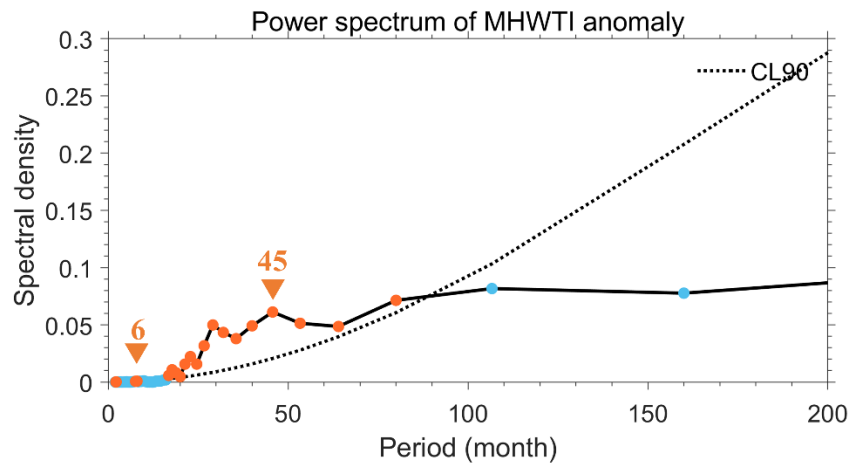

**Supplementary Figure 2.** Power spectrum analysis of marine heatwave total intensity (MHW-ICI) anomalies in the North Sea derived from OSTIA. Orange dots indicate periods exceeding the 90% confidence level (black dashed line), while blue dots represent periods below this threshold.

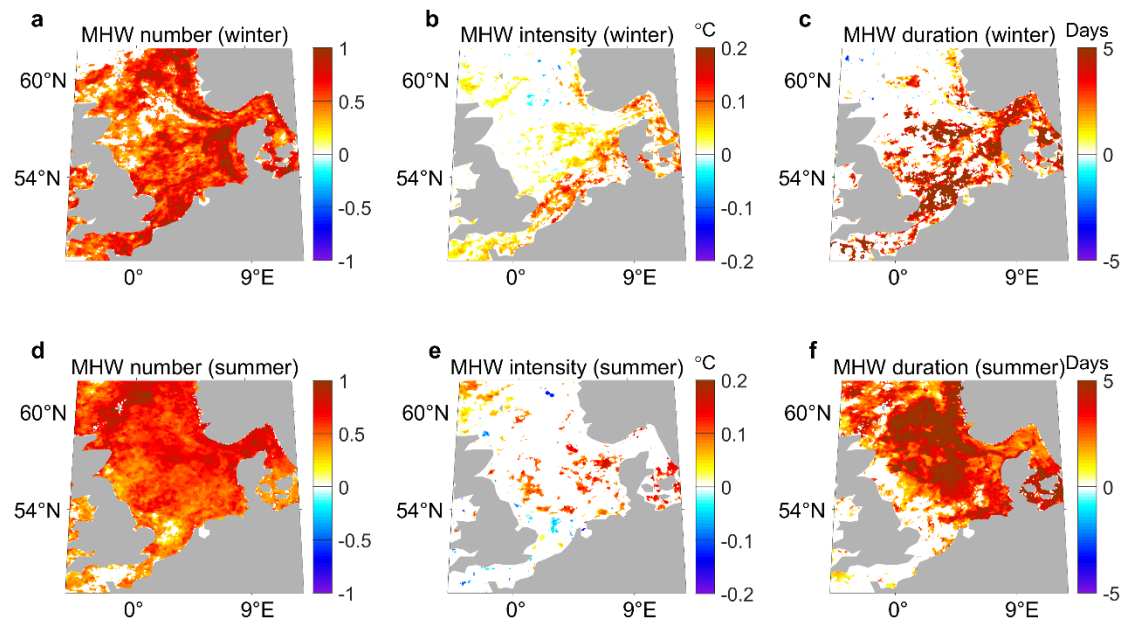

**Supplementary Figure 3.** Regression anomalies of MHW characteristics onto PC1 time series for winter positive phase (a-c) and summer (d-f). **a, d** MHW number, **b, e** intensity (°C), and **c, f** duration (days). Colored shading indicates regions significant at the 90% confidence level.

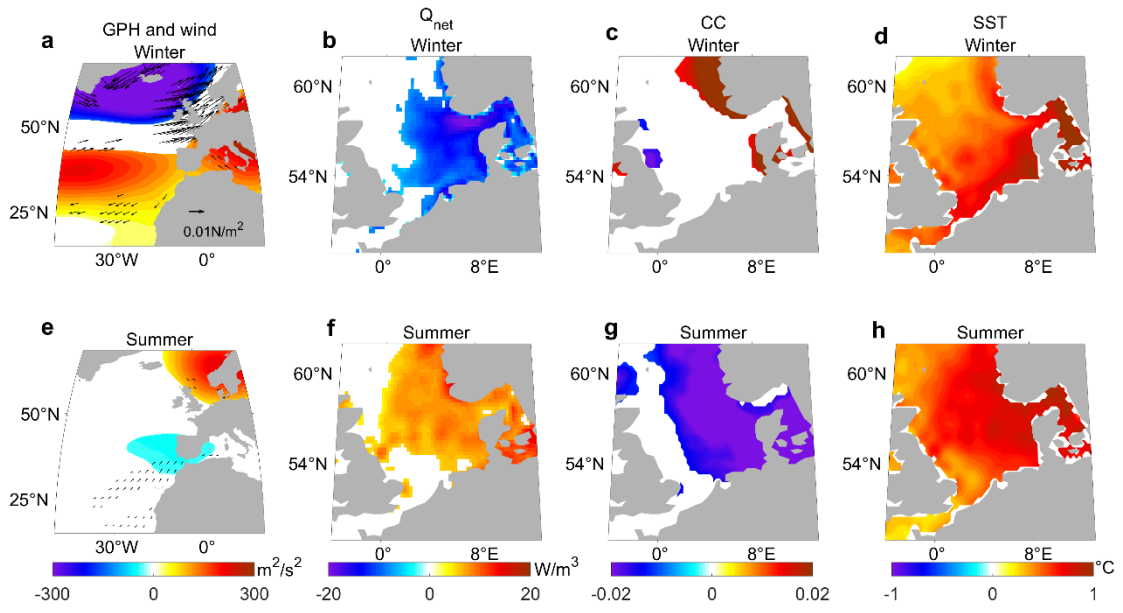

**Supplementary Figure 4.** Regression anomalies of atmospheric variables onto PC1 time series for winter positive phase (a-d) and summer (e-h). **a, e** 500-hPa geopotential height (shading,  $\text{m}^2/\text{s}^2$ ) and wind stress (vectors,  $\text{N}/\text{m}^2$ ), **b, f** net heat flux ( $\text{W}/\text{m}^2$ ) from atmosphere to ocean, **c, g** cloud cover, **d, h** sea surface temperature (SST,  $^{\circ}\text{C}$ ). Colored shading indicates regions significant at the 90% confidence level.

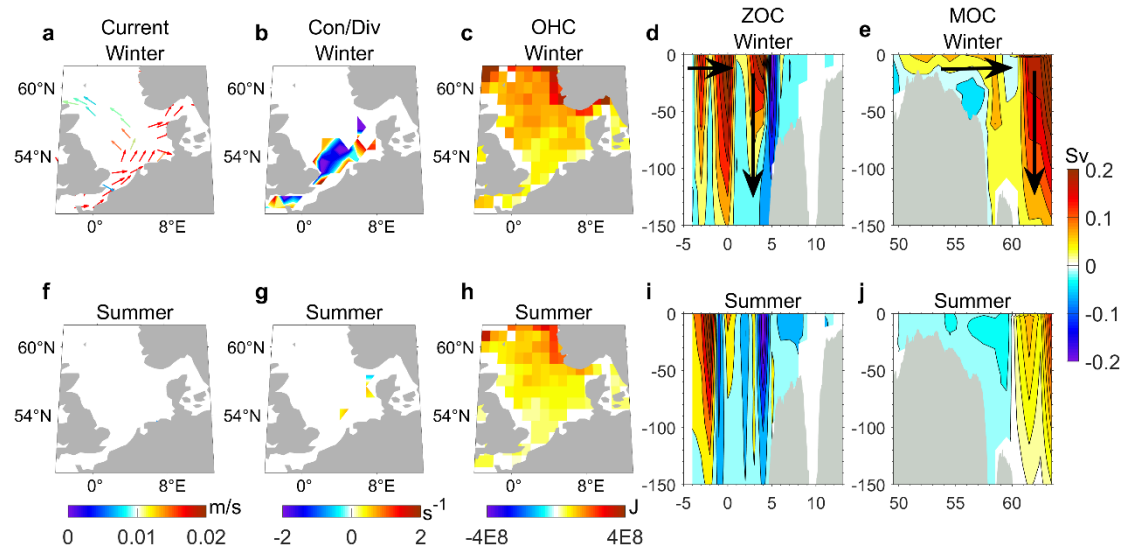

**Supplementary Figure 5.** Regression anomalies of oceanic variables onto PC1 time series for winter positive phase (a-e) and summer (f-j). **a, f** Geostrophic oceanic current (vectors, m/s), **b, g** convergence and divergence of advection ( $s^{-1}$ ), **c, h** ocean heat content (J), **d, i** zonal overturning circulations (ZOC, Sv), **e, j** meridional overturning circulations (MOC, Sv). Colored shading indicates regions significant at the 90% confidence level. The black arrow-headed lines represent the direction of flow.

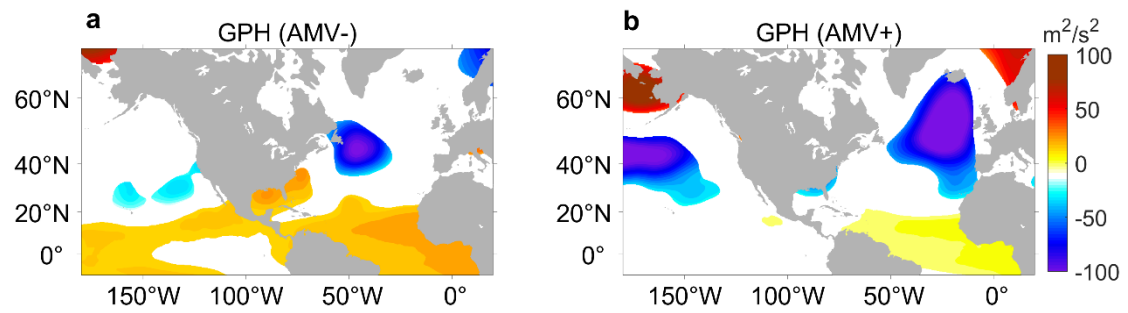

**Supplementary Figure 6.** Composite anomalies of 500-hPa geopotential height ( $\text{m}^2/\text{s}^2$ ) during **a** negative AMV phase and **b** positive AMV phase. All fields are regressed onto the JJA Nino3.4 index. Only anomalies significant at the 95% confidence level are shown.

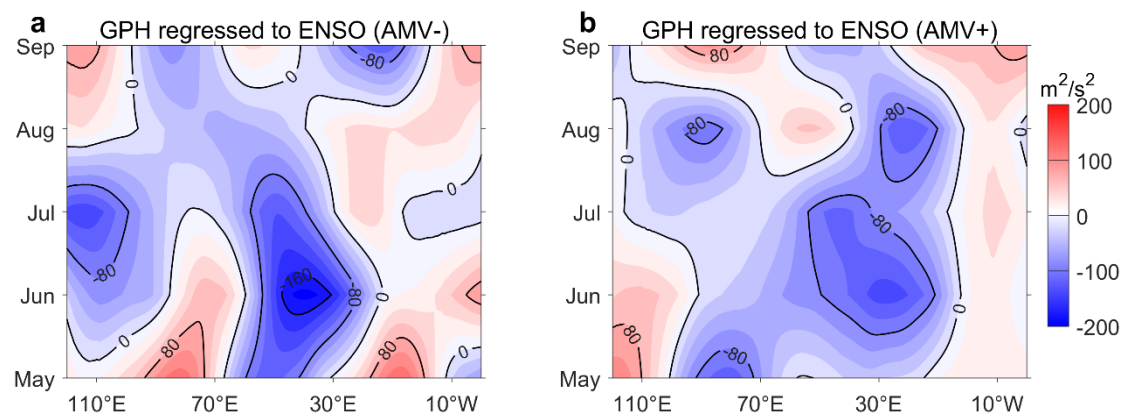

**Supplementary Figure 7.** Composite patterns of 500-hPa geopotential height anomalies ( $\text{m}^2/\text{s}^2$ ) in 45°N during **a** negative AMV phase and **b** positive AMV phase. All fields are regressed onto the JJA Nino3.4 index.



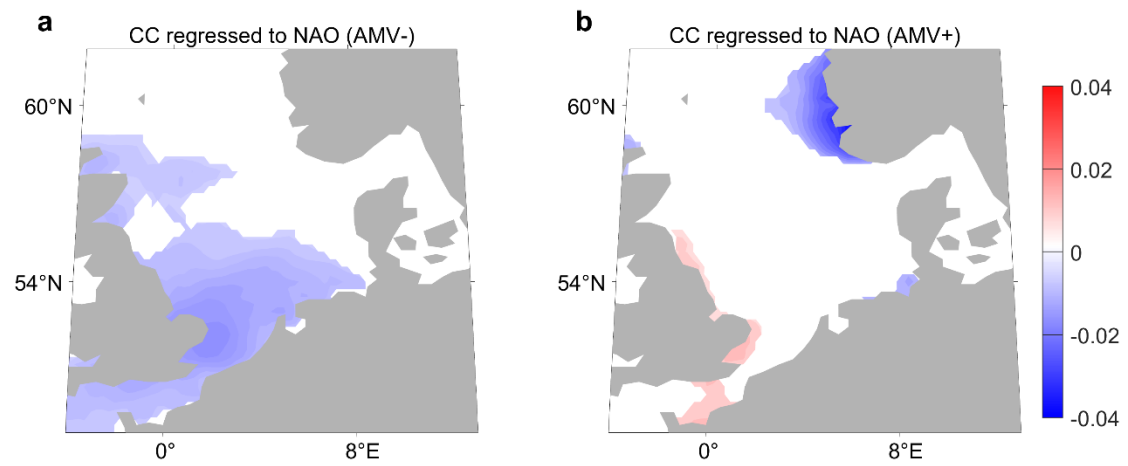

**Supplementary Figure 8.** Regression patterns of summer cloud cover anomalies onto PC1 time series during **a** negative and **b** positive AMV phases. All fields are regressed onto the DJF NAO index. Colored shading indicates regions significant at the 90% confidence level. Positive values indicate enhanced cloud cover, while negative values represent reduced cloud cover.
